# Supplementary material for: Parallel Differentiation and Plastic Adjustment of Leaf Anatomy in Alpine Arabidopsis arenosa Ecotypes
Source: MDPI journal article supplement (doi:10.3390/plants11192626), 2022-10-06
Supplement: s1 [file s1]

## Supplemental material

### Supplemental figures

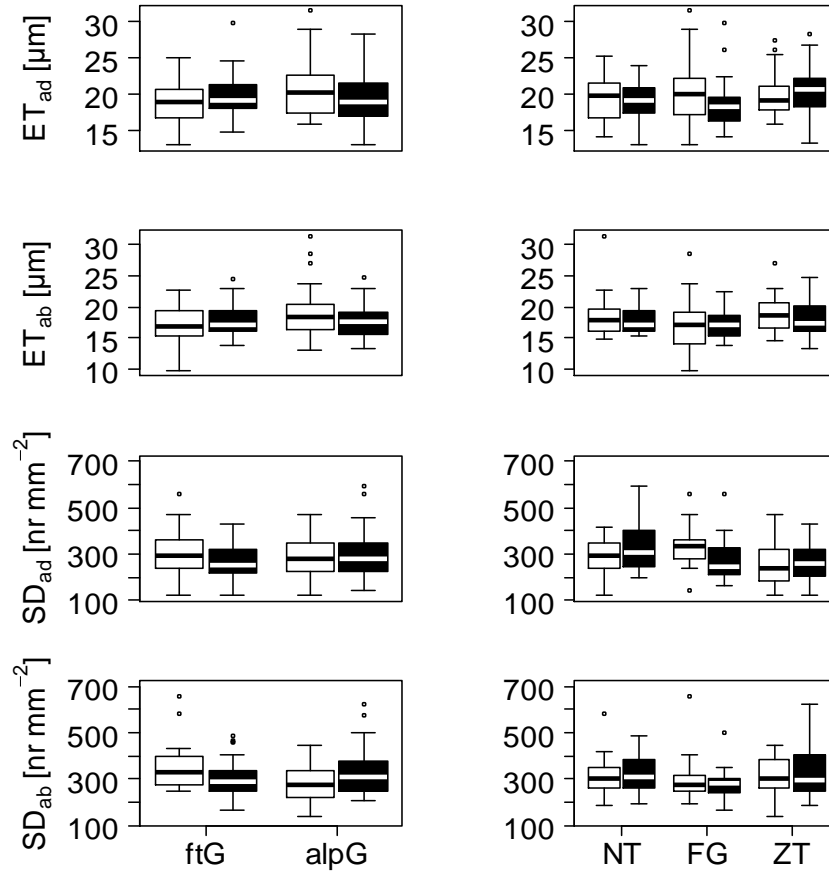

**Figure S1.** Leaf stomatal density and epidermal thickness in tetraploid *A. arenosa* populations originating from three mountain ranges. Leaf anatomical traits shown are adaxial and abaxial epidermal thickness (ET<sub>ad</sub> and ET<sub>ab</sub>), and stomatal density of the adaxial (SD<sub>ad</sub>) and abaxial (SD<sub>ab</sub>) leaf surfaces. White boxplots denote alpine populations and black ones show foothill populations grown in a foothill (ftG) and an alpine (alpG) common garden. Box plots show medians and the 25<sup>th</sup> and 75<sup>th</sup> percentiles and dots outside  $1.5 \times$  interquartile ranges represent outliers. Data of all tetraploid populations per ecotype were pooled, and panels in the left row show comparisons between the two different common gardens and panels in the right row show comparisons across mountain ranges, Niedere Tauern (NT), Fagaras mountains (FG) and Tatra mountains (ZT).

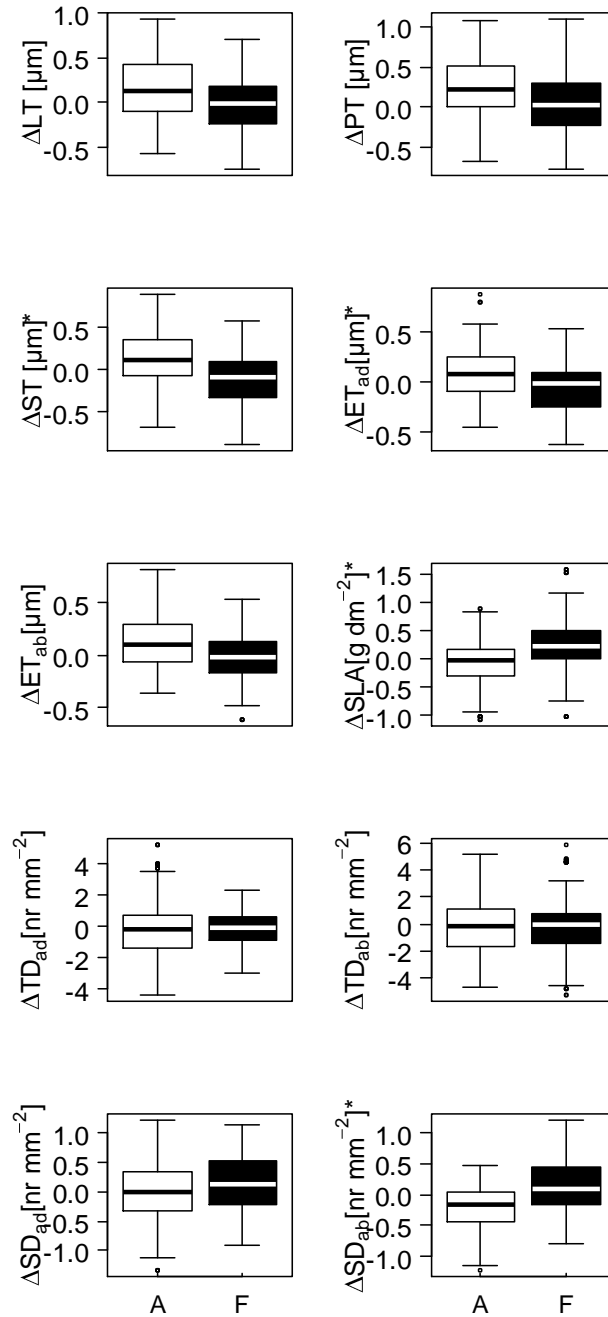

**Figure S2.** The extent of phenotypic plasticity in leaf traits of tetraploid alpine and foothill *A. arenosa* populations grown in an alpine and foothill common garden. White boxplots denote alpine populations and black ones show foothill populations. Differences ( $\Delta$ ) were calculated for each leaf trait by randomly selecting individuals from the same population in each common garden and calculating the log ratio of the trait value observed in the foothill common garden to its value in the alpine common garden. This process was repeated 100 times to ensure randomized pairing. Differences in each leaf trait were then compared using a linear mixed model, with 'ecotype' and 'mountain range' as fixed factors and 'population' as a random factor. Asterisks indicate significant differences in plasticity between ecotypes. Leaf traits analyzed were leaf thickness (LT), palisade parenchyma thickness (PT), spongy parenchyma thickness (ST), epidermis thickness on adaxial (ET<sub>ad</sub>) and on abaxial (ET<sub>ab</sub>) leaf surfaces, specific leaf area (SLA), trichome density of adaxial (TD<sub>ad</sub>) and abaxial (TD<sub>ab</sub>) and stomatal density of adaxial (SD<sub>ad</sub>) and abaxial (SD<sub>ab</sub>) leaf surfaces. Box plots show medians and the 25<sup>th</sup> and 75<sup>th</sup> percentiles and dots outside 1.5 × interquartile ranges represent outliers.

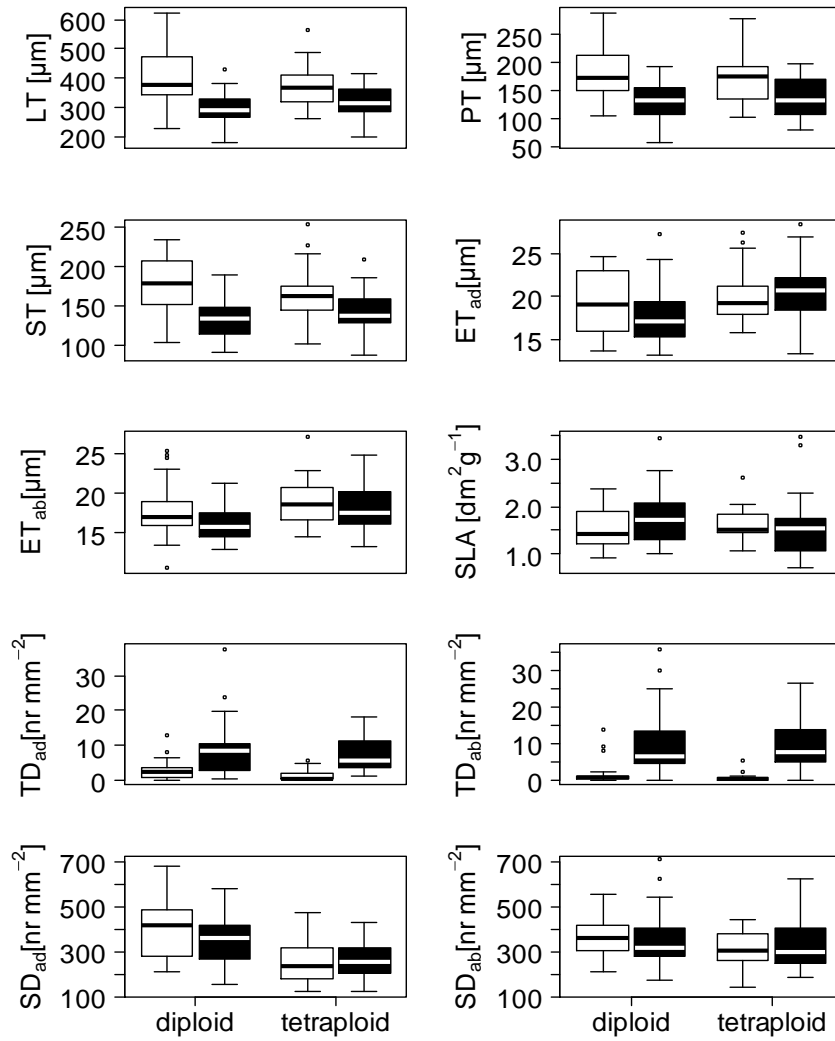

**Figure S3.** Leaf traits in diploid and tetraploid alpine and foothill *Arabidopsis arenosa* populations. Plants were produced from seeds originating from the Tatra mountains and grown in an alpine and foothill common garden. White boxplots denote alpine populations and black ones show foothill populations. Leaf traits measured were leaf thickness (LT), palisade parenchyma thickness (PT), spongy parenchyma thickness (ST), epidermis thickness on adaxial (ET<sub>ad</sub>) and on abaxial (ET<sub>ab</sub>) leaf surfaces, specific leaf area (SLA), trichome density of adaxial (TD<sub>ad</sub>) and abaxial (TD<sub>ab</sub>) and stomatal density of adaxial (SD<sub>ad</sub>) and abaxial (SD<sub>ab</sub>) leaf surfaces. Box plots show medians and the 25<sup>th</sup> and 75<sup>th</sup> percentiles and dots outside 1.5 × interquartile ranges represent outliers.

## Supplemental Tables

**Table S1.** Climatic conditions at the foothill and alpine common gardens used for reciprocal transplantation. Values are daily means  $\pm$  SD of data recorded between 1<sup>st</sup> of July and 30<sup>th</sup> of September 2018 and 2019.

| Climate factor |                              | Foothill habitat<br>(mean $\pm$ SD) | Alpine habitat<br>(mean $\pm$ SD) |
|----------------|------------------------------|-------------------------------------|-----------------------------------|
| 2018           | <b>Irradiance (PPFD)</b>     |                                     |                                   |
|                | daily sum                    | 65575 $\pm$ 34805                   | 87300 $\pm$ 37144                 |
|                | daily maximum                | 1485 $\pm$ 607                      | 2002 $\pm$ 594                    |
|                | <b>Leaf temperature (°C)</b> |                                     |                                   |
|                | daily maximum                | 29.9 $\pm$ 7.5                      | 17.2 $\pm$ 6.8                    |
|                | daily mean                   | 18.6 $\pm$ 4.2                      | 8.5 $\pm$ 3.8                     |
|                | daily minimum                | 12.7 $\pm$ 4.0                      | 3.8 $\pm$ 2.8                     |
|                | <b>Relative humidity (%)</b> |                                     |                                   |
|                | daily maximum                | 93.5 $\pm$ 11.1                     | 97.2 $\pm$ 6.5                    |
|                | daily mean                   | 77.0 $\pm$ 13.3                     | 86.0 $\pm$ 13.4                   |
|                | daily minimum                | 48.7 $\pm$ 19.3                     | 68.0 $\pm$ 20.8                   |
| 2019           | <b>Irradiance (PPFD)</b>     |                                     |                                   |
|                | daily sum                    | 40373 $\pm$ 21888                   | 135914 $\pm$ 100608               |
|                | daily maximum                | 1205 $\pm$ 550                      | 1912 $\pm$ 666                    |
|                | <b>Leaf temperature (°C)</b> |                                     |                                   |
|                | daily maximum                | 28.3 $\pm$ 9.5                      | 15.1 $\pm$ 9.1                    |
|                | daily mean                   | 16.3 $\pm$ 5.2                      | 7.1 $\pm$ 5.2                     |
|                | daily minimum                | 10.2 $\pm$ 4.3                      | 3.1 $\pm$ 3.4                     |
|                | <b>Relative humidity (%)</b> |                                     |                                   |
|                | daily maximum                | 96.5 $\pm$ 3.9                      | 98.4 $\pm$ 3.3                    |
|                | daily mean                   | 81.2 $\pm$ 11.9                     | 88.4 $\pm$ 13.0                   |
|                | daily minimum                | 52.8 $\pm$ 20.8                     | 72.7 $\pm$ 20.6                   |

**Table S2.** Differences in leaf anatomical traits of tetraploid populations from three mountains ranges grown in a reciprocal transplantation experiment. Type III Analysis of Variance Table obtained by linear mixed models relating ecotype (Ecotype), common garden and mountain range of origin (Region), and the interactions of Ecotype and common garden (Ecotype : Common garden) and of Ecotype and Region (Ecotype : Region) to various leaf anatomical traits. Degrees of freedom were approximated using Satterthwaite's method (see Methods). The nesting of populations within regions was accounted for by introducing a random factor in the model. Cutting direction (angle) was considered by another random factor. Variables were transformed by natural logarithm (log), by square root (sqrt) or cube root (crt) to achieve normal distribution and variance homogeneity.

| Factors and interactions                                             | df | Sum of Squares | F      | P                |
|----------------------------------------------------------------------|----|----------------|--------|------------------|
| <b>Total leaf thickness (LT, log)</b>                                |    |                |        |                  |
| Ecotype                                                              | 1  | 0.728          | 15.022 | <b>0.008</b>     |
| Region                                                               | 2  | 0.022          | 0.469  | 0.646            |
| Common garden                                                        | 1  | 0.891          | 18.397 | <b>&lt;0.001</b> |
| Ecotype : Region                                                     | 2  | 0.027          | 0.555  | 0.601            |
| Ecotype : Common garden                                              | 1  | 0.375          | 7.732  | <b>0.006</b>     |
| <b>Palisade parenchyma thickness (PT, log)</b>                       |    |                |        |                  |
| Ecotype                                                              | 1  | 1.511          | 18.347 | <b>0.005</b>     |
| Region                                                               | 2  | 0.205          | 1.244  | 0.352            |
| Common garden                                                        | 1  | 2.791          | 33.888 | <b>&lt;0.001</b> |
| Ecotype : Region                                                     | 2  | 0.090          | 0.549  | 0.603            |
| Ecotype : Common garden                                              | 1  | 0.196          | 2.386  | 0.123            |
| <b>Spongy parenchyma thickness (ST, sqrt)</b>                        |    |                |        |                  |
| Ecotype                                                              | 1  | 13.585         | 7.602  | <b>0.033</b>     |
| Region                                                               | 2  | 0.626          | 0.175  | 0.844            |
| Common garden                                                        | 1  | 1.545          | 0.865  | 0.353            |
| Ecotype : Region                                                     | 2  | 1.793          | 0.502  | 0.629            |
| Ecotype : Common garden                                              | 1  | 47.893         | 26.803 | <b>&lt;0.001</b> |
| <b>Adaxial epidermis thickness (ET<sub>ad</sub>, log)</b>            |    |                |        |                  |
| Ecotype                                                              | 1  | 0.003          | 0.079  | 0.788            |
| Region                                                               | 2  | 0.120          | 1.734  | 0.253            |
| Common garden                                                        | 1  | 0.481          | 13.943 | <b>&lt;0.001</b> |
| Ecotype : Region                                                     | 2  | 0.028          | 0.412  | 0.679            |
| Ecotype : Common garden                                              | 1  | 0.311          | 9.016  | <b>0.003</b>     |
| <b>Abaxial epidermis thickness (ET<sub>ab</sub>, log)</b>            |    |                |        |                  |
| Ecotype                                                              | 1  | 0.005          | 0.111  | 0.750            |
| Region                                                               | 2  | 0.189          | 2.255  | 0.186            |
| Common garden                                                        | 1  | 0.461          | 11.016 | <b>&lt;0.001</b> |
| Ecotype : Region                                                     | 2  | 0.021          | 0.257  | 0.781            |
| Ecotype : Common garden                                              | 1  | 0.248          | 5.924  | <b>0.015</b>     |
| <b>Relative proportion of palisade parenchyma (PP<sub>rel</sub>)</b> |    |                |        |                  |
| Ecotype                                                              | 1  | 320.17         | 6.494  | <b>0.044</b>     |
| Region                                                               | 2  | 86.96          | 0.882  | 0.462            |
| Common garden                                                        | 1  | 2.24           | 0.045  | 0.831            |
| Ecotype : Region                                                     | 2  | 19.58          | 0.199  | 0.825            |
| Ecotype : Common garden                                              | 1  | 1347.66        | 27.333 | <b>&lt;0.001</b> |

| Relative proportion of spongy parenchyma ( $PP_{rel}$ )          |   |         |        |                  |
|------------------------------------------------------------------|---|---------|--------|------------------|
| Ecotype                                                          | 1 | 405.03  | 7.907  | <b>0.005</b>     |
| Region                                                           | 2 | 148.88  | 1.453  | 0.235            |
| Common garden                                                    | 1 | 154.00  | 3.007  | 0.084            |
| Ecotype : Region                                                 | 2 | 90.86   | 0.887  | 0.413            |
| Ecotype : Common garden                                          | 1 | 1223.78 | 23.892 | <b>&lt;0.001</b> |
| Relative proportion of intercellular spaces ( $IC_{rel}$ , sqrt) |   |         |        |                  |
| Ecotype                                                          | 1 | 0.131   | 0.290  | 0.593            |
| Region                                                           | 2 | 0.217   | 0.240  | 0.788            |
| Common garden                                                    | 1 | 0.036   | 0.079  | 0.780            |
| Ecotype : Region                                                 | 2 | 0.876   | 0.968  | 0.389            |
| Ecotype : Common garden                                          | 1 | 0.098   | 0.216  | 0.645            |
| Specific leaf area (SLA, log)                                    |   |         |        |                  |
| Ecotype                                                          | 1 | 0.123   | 1.529  | 0.261            |
| Region                                                           | 2 | 0.304   | 1.880  | 0.231            |
| Common garden                                                    | 1 | 0.303   | 3.747  | 0.055            |
| Ecotype : Region                                                 | 2 | 0.311   | 1.929  | 0.224            |
| Ecotype : Common garden                                          | 1 | 0.735   | 9.108  | <b>0.003</b>     |
| Adaxial trichome density ( $TD_{ad}$ , crt)                      |   |         |        |                  |
| Ecotype                                                          | 1 | 9.411   | 34.291 | <b>0.001</b>     |
| Region                                                           | 2 | 3.951   | 7.199  | <b>0.029</b>     |
| Common garden                                                    | 1 | 0.226   | 0.822  | 0.366            |
| Ecotype : Region                                                 | 2 | 1.160   | 2.112  | 0.209            |
| Ecotype : Common garden                                          | 1 | 0.063   | 0.229  | 0.633            |
| Abaxial trichome density ( $TD_{ab}$ , crt)                      |   |         |        |                  |
| Ecotype                                                          | 1 | 19.283  | 39.818 | <b>&lt;0.001</b> |
| Region                                                           | 2 | 4.049   | 4.180  | <b>0.074</b>     |
| Common garden                                                    | 1 | 0.065   | 0.133  | 0.716            |
| Ecotype : Region                                                 | 2 | 2.271   | 2.345  | 0.178            |
| Ecotype : Common garden                                          | 1 | 0.573   | 1.184  | 0.278            |
| Adaxial stomatal density ( $SD_{ad}$ , sqrt)                     |   |         |        |                  |
| Ecotype                                                          | 1 | 0.007   | 0.095  | 0.759            |
| Region                                                           | 2 | 0.660   | 4.763  | <b>0.010</b>     |
| Common garden                                                    | 1 | 0.027   | 0.387  | 0.535            |
| Ecotype : Region                                                 | 2 | 0.365   | 2.636  | 0.076            |
| Ecotype : Common garden                                          | 1 | 0.082   | 1.187  | 0.278            |
| Abaxial stomatal density ( $SD_{ab}$ , sqrt)                     |   |         |        |                  |
| Ecotype                                                          | 1 | 0.002   | 0.031  | 0.866            |
| Region                                                           | 2 | 0.072   | 0.607  | 0.572            |
| Common garden                                                    | 1 | 0.091   | 1.536  | 0.218            |
| Ecotype : Region                                                 | 2 | 0.052   | 0.443  | 0.660            |
| Ecotype : Common garden                                          | 1 | 0.576   | 9.772  | <b>0.002</b>     |

**Table S3.** Differences in the extent of plasticity for each leaf anatomical trait of tetraploid populations from three mountains ranges grown in a reciprocal transplantation experiment. Type III Analysis of Variance Table obtained by linear mixed models relating ecotype (Ecotype), and mountain range of origin (Region), as well as the interaction of Ecotype and Region (Ecotype : Region) to differences in trait expression in various leaf anatomical traits, i.e. total leaf thickness (LT), thickness of palisade parenchyma (PT), thickness of spongy parenchyma (ST), epidermis thickness on adaxial (ET<sub>ad</sub>) and on abaxial (ET<sub>ab</sub>) leaf surfaces, specific leaf area (SLA), trichomes density on adaxial (TD<sub>ad</sub>) and abaxial (TD<sub>ab</sub>) leaf surfaces, stomatal density of adaxial (SD<sub>ad</sub>) and abaxial (SD<sub>ab</sub>) leaf surfaces. Degrees of freedom were approximated using Satterthwaite's method (see Methods). The nesting of populations within regions was accounted for by introducing a random factor in the model. Differences were calculated by randomly assigning individuals from the same population but different common gardens and using a log ratio of the trait value observed in the foothill common garden to its value in the alpine common garden [ $\log(\text{trait}_{\text{fCG}}/\text{trait}_{\text{aPG}})$ ]. The selection process was repeated 100 times.

| Leaf anatomical trait   | <i>df</i> | <i>Sum of Squares</i> | <i>F</i> | <i>p</i>     |
|-------------------------|-----------|-----------------------|----------|--------------|
| <b>ΔLT</b>              |           |                       |          |              |
| Ecotype                 | 1         | 0.270                 | 3.453    | 0.113        |
| Region                  | 2         | 0.184                 | 1.174    | 0.371        |
| Ecotype : Region        | 2         | 0.205                 | 1.309    | 0.338        |
| <b>ΔPT</b>              |           |                       |          |              |
| Ecotype                 | 1         | 0.277                 | 2.330    | 0.177        |
| Region                  | 2         | 0.173                 | 0.727    | 0.522        |
| Ecotype : Region        | 2         | 0.240                 | 1.010    | 0.419        |
| <b>ΔST</b>              |           |                       |          |              |
| Ecotype                 | 1         | 0.718                 | 8.716    | <b>0.025</b> |
| Region                  | 2         | 0.005                 | 0.031    | 0.970        |
| Ecotype : Region        | 2         | 0.272                 | 1.653    | 0.268        |
| <b>ΔET<sub>ad</sub></b> |           |                       |          |              |
| Ecotype                 | 1         | 0.321                 | 7.490    | <b>0.034</b> |
| Region                  | 2         | 0.162                 | 1.889    | 0.231        |
| Ecotype : Region        | 2         | 0.040                 | 0.465    | 0.649        |
| <b>ΔET<sub>ab</sub></b> |           |                       |          |              |
| Ecotype                 | 1         | 0.274                 | 5.935    | 0.051        |
| Region                  | 2         | 0.053                 | 0.574    | 0.591        |
| Ecotype : Region        | 2         | 0.137                 | 1.484    | 0.299        |
| <b>ΔSLA</b>             |           |                       |          |              |
| Ecotype                 | 1         | 1.304                 | 10.803   | <b>0.017</b> |
| Region                  | 2         | 1.210                 | 5.013    | 0.052        |
| Ecotype : Region        | 2         | 0.529                 | 2.192    | 0.193        |
| <b>ΔTD<sub>ad</sub></b> |           |                       |          |              |
| Ecotype                 | 1         | 0.429                 | 0.278    | 0.617        |
| Region                  | 2         | 11.795                | 3.823    | 0.085        |
| Ecotype : Region        | 2         | 0.679                 | 0.220    | 0.809        |
| <b>ΔTD<sub>ab</sub></b> |           |                       |          |              |
| Ecotype                 | 1         | 0.405                 | 0.138    | 0.723        |
| Region                  | 2         | 28.204                | 4.814    | 0.057        |
| Ecotype : Region        | 2         | 0.928                 | 0.158    | 0.857        |
| <b>ΔSD<sub>ad</sub></b> |           |                       |          |              |
| Ecotype                 | 1         | 0.165                 | 0.996    | 0.357        |
| Region                  | 2         | 0.431                 | 1.301    | 0.339        |
| Ecotype : Region        | 2         | 0.429                 | 1.297    | 0.340        |
| <b>ΔSD<sub>ab</sub></b> |           |                       |          |              |
| Ecotype                 | 1         | 1.286                 | 10.502   | <b>0.018</b> |
| Region                  | 2         | 0.326                 | 1.333    | 0.332        |
| Ecotype : Region        | 2         | 0.077                 | 0.314    | 0.742        |

**Table S4.** Differences in leaf anatomical traits of diploid and tetraploid populations from the Tatra mountains grown in a reciprocal transplantation experiment. Type III Analysis of Variance Table obtained by linear mixed models relating ecotype (Ecotype), common garden and ploidy level (Ploidy), as well as the interaction of ecotype and common garden (Ecotype : Common garden) and the interaction of Ecotype and Ploidy (Ecotype : Ploidy) to various leaf anatomical traits. Degrees of freedom are approximated using Satterthwaite's method (see Methods). The nesting of individuals within populations was accounted for by introducing a random factor in the model. Cutting direction (angle) was considered by another random factor. Variables were transformed by natural logarithm (log), by square root (sqrt) or cube root (crt) to achieve normal distribution and variance homogeneity.

| Factors and interactions                                             | df | Sum of Squares | F      | p                |
|----------------------------------------------------------------------|----|----------------|--------|------------------|
| <b>Total leaf thickness (LT, log)</b>                                |    |                |        |                  |
| Ecotype                                                              | 1  | 0.274          | 6.359  | 0.065            |
| Ploidy                                                               | 1  | 0.004          | 0.091  | 0.778            |
| Common garden                                                        | 1  | 0.423          | 9.811  | <b>0.002</b>     |
| Ecotype : Ploidy                                                     | 1  | 0.073          | 1.688  | 0.262            |
| Ecotype : Common garden                                              | 1  | 0.276          | 6.405  | <b>0.012</b>     |
| <b>Palisade parenchyma thickness (PT, log)</b>                       |    |                |        |                  |
| Ecotype                                                              | 1  | 0.342          | 4.639  | 0.097            |
| Ploidy                                                               | 1  | 0.007          | 0.092  | 0.776            |
| Common garden                                                        | 1  | 0.970          | 13.170 | <b>&lt;0.001</b> |
| Ecotype : Ploidy                                                     | 1  | 0.063          | 0.859  | 0.405            |
| Ecotype : Common garden                                              | 1  | 0.001          | 0.007  | 0.933            |
| <b>Spongy parenchyma thickness (ST, sqrt)</b>                        |    |                |        |                  |
| Ecotype                                                              | 1  | 9.803          | 5.648  | 0.079            |
| Ploidy                                                               | 1  | 0.185          | 0.106  | 0.761            |
| Common garden                                                        | 1  | 8.202          | 4.726  | <b>0.031</b>     |
| Ecotype : Ploidy                                                     | 1  | 2.965          | 1.708  | 0.262            |
| Ecotype : Common garden                                              | 1  | 57.761         | 33.280 | <b>&lt;0.001</b> |
| <b>Adaxial epidermis thickness (ET<sub>ad</sub>, log)</b>            |    |                |        |                  |
| Ecotype                                                              | 1  | 0.003          | 0.089  | 0.774            |
| Ploidy                                                               | 1  | 0.119          | 1.693  | 0.260            |
| Common garden                                                        | 1  | 0.374          | 10.672 | <b>0.001</b>     |
| Ecotype : Ploidy                                                     | 1  | 0.030          | 0.433  | 0.667            |
| Ecotype : Common garden                                              | 1  | 0.312          | 8.891  | 0.003            |
| <b>Abaxial epidermis thickness (ET<sub>ab</sub>, log)</b>            |    |                |        |                  |
| Ecotype                                                              | 1  | 0.036          | 0.894  | 0.399            |
| Ploidy                                                               | 1  | 0.089          | 2.242  | 0.209            |
| Common garden                                                        | 1  | 0.342          | 8.556  | <b>0.004</b>     |
| Ecotype : Ploidy                                                     | 1  | 0.022          | 0.565  | 0.494            |
| Ecotype : Common garden                                              | 1  | 0.151          | 3.778  | 0.052            |
| <b>Relative proportion of palisade parenchyma (PP<sub>rel</sub>)</b> |    |                |        |                  |
| Ecotype                                                              | 1  | 168.56         | 2.849  | 0.174            |
| Ploidy                                                               | 1  | 64.31          | 1.087  | 0.361            |
| Common garden                                                        | 1  | 99.62          | 1.684  | 0.196            |
| Ecotype : Ploidy                                                     | 1  | 29.28          | 0.495  | 0.524            |
| Ecotype : Common garden                                              | 1  | 1378.39        | 23.294 | <b>&lt;0.001</b> |



| Relative proportion of spongy parenchyma (PP <sub>rel</sub> )          |   |         |        |                  |
|------------------------------------------------------------------------|---|---------|--------|------------------|
| Ecotype                                                                | 1 | 17.01   | 0.324  | 0.602            |
| Ploidy                                                                 | 1 | 27.49   | 0.524  | 0.511            |
| Common garden                                                          | 1 | 340.44  | 6.491  | <b>0.012</b>     |
| Ecotype : Ploidy                                                       | 1 | 8.45    | 0.161  | 0.710            |
| Ecotype : Common garden                                                | 1 | 1939.26 | 36.975 | <b>&lt;0.001</b> |
| Relative proportion of intercellular spaces (IC <sub>rel</sub> , sqrt) |   |         |        |                  |
| Ecotype                                                                | 1 | 0.000   | 0.000  | 0.999            |
| Ploidy                                                                 | 1 | 0.130   | 0.419  | 0.522            |
| Common garden                                                          | 1 | 0.019   | 0.062  | 0.805            |
| Ecotype : Ploidy                                                       | 1 | 0.079   | 0.255  | 0.617            |
| Ecotype : Common garden                                                | 1 | 0.015   | 0.050  | 0.825            |
| Specific leaf area (SLA, log)                                          |   |         |        |                  |
| Ecotype                                                                | 1 | 0.107   | 1.480  | 0.293            |
| Ploidy                                                                 | 1 | 0.024   | 0.335  | 0.594            |
| Common garden                                                          | 1 | 0.468   | 6.485  | <b>0.013</b>     |
| Ecotype : Ploidy                                                       | 1 | 0.092   | 1.275  | 0.323            |
| Ecotype : Common garden                                                | 1 | 1.139   | 15.768 | <b>&lt;0.001</b> |
| Adaxial trichome density (TD <sub>ad</sub> , crt)                      |   |         |        |                  |
| Ecotype                                                                | 1 | 0.031   | 0.131  | 0.736            |
| Ploidy                                                                 | 1 | 0.143   | 0.609  | 0.479            |
| Common garden                                                          | 1 | 3.736   | 15.911 | <b>&lt;0.001</b> |
| Ecotype : Ploidy                                                       | 1 | 0.143   | 0.611  | 0.479            |
| Ecotype : Common garden                                                | 1 | 0.001   | 0.006  | 0.941            |
| Abaxial trichome density (TD <sub>ab</sub> , crt)                      |   |         |        |                  |
| Ecotype                                                                | 1 | 0.294   | 0.875  | 0.404            |
| Ploidy                                                                 | 1 | 0.072   | 0.214  | 0.668            |
| Common garden                                                          | 1 | 6.047   | 17.989 | <b>&lt;0.001</b> |
| Ecotype : Ploidy                                                       | 1 | 0.143   | 0.426  | 0.549            |
| Ecotype : Common garden                                                | 1 | 0.220   | 0.654  | 0.421            |
| Adaxial stomatal density (SD <sub>ad</sub> , sqrt)                     |   |         |        |                  |
| Ecotype                                                                | 1 | 0.259   | 2.285  | 0.135            |
| Ploidy                                                                 | 1 | 2.172   | 19.190 | <b>&lt;0.001</b> |
| Common garden                                                          | 1 | 0.009   | 0.079  | 0.779            |
| Ecotype : Ploidy                                                       | 1 | 0.180   | 1.591  | 0.211            |
| Ecotype : Common garden                                                | 1 | 0.097   | 0.856  | 0.358            |
| Abaxial stomatal density (SD <sub>ab</sub> , sqrt)                     |   |         |        |                  |
| Ecotype                                                                | 1 | 0.041   | 0.613  | 0.436            |
| Ploidy                                                                 | 1 | 0.368   | 5.451  | <b>0.022</b>     |
| Common garden                                                          | 1 | 0.081   | 1.201  | 0.276            |
| Ecotype : Ploidy                                                       | 1 | 0.033   | 0.494  | 0.484            |
| Ecotype : Common garden                                                | 1 | 0.677   | 10.025 | <b>0.002</b>     |

**Table S5.** Differences in plasticity for each leaf anatomical trait of diploid and tetraploid populations from the Tatra mountains. Type III Analysis of Variance Table obtained by linear mixed models relating ecotype (Ecotype), ploidy level (Ploidy), and their interaction (Ecotype : Ploidy) to differences in leaf anatomical trait expression, i.e. total leaf thickness (LT), palisade parenchyma thickness (PT), spongy parenchyma thickness (ST), epidermis thickness on adaxial (ET<sub>ad</sub>) and abaxial (ET<sub>ab</sub>) leaf surfaces, specific leaf area (SLA), trichomes density on adaxial (TD<sub>ad</sub>) and abaxial (TD<sub>ab</sub>) leaf surfaces, stomatal density of adaxial (SD<sub>ad</sub>) and abaxial (SD<sub>ab</sub>) leaf surfaces. Degrees of freedom were approximated (see Methods). The nesting of individuals into populations within regions was accounted for by introducing a random factor in the model. Differences ( $\Delta$ ) were calculated by randomly selecting individuals from the same population in each common garden and calculating the log ratio of the trait value observed in the foothill common garden to its value in the alpine common garden. The selection process was repeated 100 times.

| Leaf anatomical trait                     | <i>df</i> | <i>Sum of Squares</i> | <i>F</i> | <i>p</i> |
|-------------------------------------------|-----------|-----------------------|----------|----------|
| <b><math>\Delta</math>LT</b>              |           |                       |          |          |
| Ecotype                                   | 1         | 0.003                 | 0.041    | 0.850    |
| Ploidy                                    | 1         | 0.001                 | 0.016    | 0.905    |
| Ecotype : Ploidy                          | 1         | 0.004                 | 0.071    | 0.803    |
| <b><math>\Delta</math>PT</b>              |           |                       |          |          |
| Ecotype                                   | 1         | 0.006                 | 0.058    | 0.821    |
| Ploidy                                    | 1         | 0.002                 | 0.026    | 0.880    |
| Ecotype : Ploidy                          | 1         | 0.005                 | 0.050    | 0.833    |
| <b><math>\Delta</math>ST</b>              |           |                       |          |          |
| Ecotype                                   | 1         | 0.074                 | 1.138    | 0.346    |
| Ploidy                                    | 1         | 0.084                 | 1.282    | 0.321    |
| Ecotype : Ploidy                          | 1         | 0.002                 | 0.038    | 0.855    |
| <b><math>\Delta</math>ET<sub>ad</sub></b> |           |                       |          |          |
| Ecotype                                   | 1         | 0.102                 | 2.286    | 0.205    |
| Ploidy                                    | 1         | 0.016                 | 0.359    | 0.582    |
| Ecotype : Ploidy                          | 1         | 0.049                 | 1.090    | 0.355    |
| <b><math>\Delta</math>ET<sub>ab</sub></b> |           |                       |          |          |
| Ecotype                                   | 1         | 0.000                 | 0.002    | 0.965    |
| Ploidy                                    | 1         | 0.000                 | 0.008    | 0.934    |
| Ecotype : Ploidy                          | 1         | 0.007                 | 0.168    | 0.703    |
| <b><math>\Delta</math>SLA</b>             |           |                       |          |          |
| Ecotype                                   | 1         | 0.486                 | 3.983    | 0.117    |
| Ploidy                                    | 1         | 0.226                 | 1.853    | 0.245    |
| Ecotype : Ploidy                          | 1         | 0.003                 | 0.029    | 0.874    |
| <b><math>\Delta</math>TD<sub>ad</sub></b> |           |                       |          |          |
| Ecotype                                   | 1         | 0.098                 | 0.066    | 0.809    |
| Ploidy                                    | 1         | 0.140                 | 0.095    | 0.773    |
| Ecotype : Ploidy                          | 1         | 0.000                 | 0.000    | 0.993    |
| <b><math>\Delta</math>TD<sub>ab</sub></b> |           |                       |          |          |
| Ecotype                                   | 1         | 3.515                 | 1.658    | 0.267    |
| Ploidy                                    | 1         | 0.032                 | 0.015    | 0.907    |
| Ecotype : Ploidy                          | 1         | 0.124                 | 0.059    | 0.821    |
| <b><math>\Delta</math>SD<sub>ad</sub></b> |           |                       |          |          |
| Ecotype                                   | 1         | 0.647                 | 1.381    | 0.305    |
| Ploidy                                    | 1         | 0.073                 | 0.156    | 0.713    |
| Ecotype : Ploidy                          | 1         | 0.460                 | 0.981    | 0.378    |
| <b><math>\Delta</math>SD<sub>ab</sub></b> |           |                       |          |          |
| Ecotype                                   | 1         | 0.254                 | 0.783    | 0.426    |
| Ploidy                                    | 1         | 0.239                 | 0.736    | 0.439    |
| Ecotype : Ploidy                          | 1         | 0.009                 | 0.027    | 0.878    |

**Table S6.** Environmental conditions recorded during the week before sampling: sampling date, day length, minimum and max air temperature ( $T_{\min}$ ,  $T_{\max}$ ).

| <b>Common garden</b>                                | <b>Sampling date</b> | <b>Day/night [h]</b> | <b><math>T_{\min}</math>/ <math>T_{\max}</math> [°C]</b> |
|-----------------------------------------------------|----------------------|----------------------|----------------------------------------------------------|
| <b>Foothill common garden,<br/>Aigen im Ennstal</b> | 16-04-2019           | 13.5 / 10.5          | 2 / 9                                                    |
|                                                     | 19-04-2019           | 13.5 / 10.5          | 2 / 15                                                   |
|                                                     | 24-04-2019           | 14 / 10              | 5 / 20                                                   |
|                                                     | 27-04-2019           | 14.5 / 9.5           | 7 / 21                                                   |
|                                                     | 02-05-2019           | 14.5 / 9.5           | 4 / 15                                                   |
| <b>Alpine common garden,<br/>Mt. Hohenwart</b>      | 04-07-2019           | 17 / 7               | 6 / 21                                                   |
|                                                     | 11-07-2019           | 17 / 7               | 5 / 11                                                   |
